# Supplementary material
Source: publisher figshare collection journal article supplement (https://plos.figshare.com/articles/dataset/_/7994450)
Supplement: Supplementary file [file 1]

**S3 Table for: Distinct evolutionary dynamics of horizontal gene transfer in drug resistant and virulent clones of *Klebsiella pneumoniae***

Kelly L Wyres<sup>1\*</sup>, Ryan R Wick<sup>1</sup>, Louise M Judd<sup>1</sup>, Roni Froumine<sup>1</sup>, Alex Tokolyi<sup>2</sup>, Claire L Gorrie<sup>3</sup>, Margaret M C Lam<sup>1</sup>, Sebastián Duchêne<sup>2</sup>, Adam Jenney<sup>4</sup> and Kathryn E Holt<sup>1,2,5</sup>

<sup>1</sup>Department of Infectious Diseases, Monash University, Melbourne, Victoria, Australia

<sup>2</sup>Department of Biochemistry and Molecular Biology, Bio21 Molecular Science and Biotechnology Institute, University of Melbourne, Parkville, Victoria, Australia

<sup>3</sup>Department of Infectious Diseases and Microbiology Unit, The Alfred Hospital, Melbourne, Victoria, Australia

<sup>4</sup>Microbiological Diagnostic Unit Public Health Laboratory, Department of Microbiology and Immunology, University of Melbourne, Peter Doherty Institute for Infection and Immunity, Melbourne, Victoria, Australia

<sup>5</sup>London School of Hygiene and Tropical Medicine, Keppel Street, London, UK

\* Corresponding author; [kelly.wyres@monash.edu](mailto:kelly.wyres@monash.edu)

**S3 Table: Outcomes of statistical tests to assess the influence of sampling bias**

| Outcome variable                                                     | Explanatory variable                                 |                                                      |                                                      |
|----------------------------------------------------------------------|------------------------------------------------------|------------------------------------------------------|------------------------------------------------------|
|                                                                      | Sample size                                          | Geographic diversity                                 | Nucleotide diversity                                 |
|                                                                      | P (uncorrected)<br>* significant after<br>correction | P (uncorrected)<br>* significant after<br>correction | P (uncorrected)<br>* significant after<br>correction |
| Pairwise nucleotide diversity (before recombination removal, median) | 0.235                                                | 0.054                                                | n/a                                                  |
| Pairwise nucleotide diversity (after recombination removal, median)  | 0.282                                                | 0.101                                                | n/a                                                  |
| r/m                                                                  | 0.742                                                | 0.295                                                | 0.200                                                |
| # K-loci                                                             | <b>7.12 x 10<sup>-05</sup> *</b>                     | 0.392                                                | 0.291                                                |
| K locus diversity                                                    | 0.259                                                | 0.826                                                | 0.411                                                |
| # O loci                                                             | <b>0.016 *</b>                                       | 0.781                                                | 0.541                                                |
| O-locus diversity                                                    | 0.560                                                | 0.612                                                | 0.962                                                |
| Gene content                                                         |                                                      |                                                      |                                                      |
| Jaccard distance (median)                                            | 0.836                                                | 0.361                                                | 0.770                                                |
| Pan-genome                                                           |                                                      |                                                      |                                                      |
| Euclidean distance (median)                                          | 0.448                                                | 0.996                                                | 0.519                                                |
| Pan-genome curve alpha                                               | 0.429                                                | 0.320                                                | 0.299                                                |
| Accessory gene ancestral diversity                                   | 0.706                                                | 0.544                                                | 0.424                                                |
| Phage Euclidean distance (median)                                    | 0.023                                                | 0.253                                                | 0.5                                                  |
| Plasmid replicon diversity                                           | <b>0.017 *</b>                                       | 0.022                                                | 0.173                                                |
| Plasmid <i>mob</i> diversity                                         | 0.187                                                | 0.926                                                | 0.533                                                |

Variables are clone-specific summary metrics tested in independent general linear models. Explanatory variables: Sample size = total number of genomes in the clone sample; Geographic diversity = effective Shannon's diversity of continent of isolate collection (as defined in S1 Table, excluding isolates from unknown geographies); Nucleotide diversity = median pairwise nucleotide diversity after removal of recombinant regions detected by Gubbins. Uncorrected p-values are shown. \* indicates significance after Bonferroni multiple testing correction (within rows, P(type 1 error) <0.05).
